# Supplementary material for: Breeding of High Cooking and Eating Quality in Rice by Marker-Assisted Backcrossing (MABc) Using KASP Markers
Source: MDPI journal article supplement (doi:10.3390/plants10040804), 2021-04-19
Supplement: s1 [file s1]

**Table S1.** Information about markers used in foreground selection.

| Marker    | Ori. | Seq.                                                             | Product Size (bp) | T <sub>m</sub> (°C) |
|-----------|------|------------------------------------------------------------------|-------------------|---------------------|
| SSIIa_1st | Fw   | CTAGGGGATATGCTCCGAGA                                             | 661               | 58                  |
|           | Rv   | TCCACCTCGAGTGTGTCTTC                                             |                   |                     |
| SSIIa_2nd | Fw   | ACACTCTTCCCTACACGACGCTCTTCCGATCTTT-<br><b>GCCCAGAAATTTGTTGAA</b> | 202               | 59                  |
|           | Rv   | GTGACTGGAGTTCAGACGTGTGCTCTTCCGATCT <b>CCACTGCAGCAC-TATGCAAT</b>  |                   |                     |

**Table S2.** Genes identified with SNP and amino acid variation in mutant region between Samgwang and Milkyqueen.

| No. | Gene ID      | SNP Position(bp) | Reference | Allele | Amino Acid Mutation | Gene Description                                  |
|-----|--------------|------------------|-----------|--------|---------------------|---------------------------------------------------|
| 1   | Os08g0143400 | 2,388,554        | T         | C      | I(T) / T(C)         | SWIRM and amine oxidase domain-containing protein |
| 2   | Os08g0146001 | 2,584,408        | G         | T      | T(G,T)              | Hypothetical conserved gene                       |
| 3   | Os08g0149000 | 2,808,619        | G         | T      | E(G) / D(T)         | Conserved hypothetical protein                    |
|     |              | 2,810,430        | T         | C      |                     |                                                   |
|     |              | 2,810,464        | G         | A      |                     |                                                   |
|     |              | 2,810,468        | G         | T      |                     |                                                   |
|     |              | 2,810,575        | T         | C      |                     |                                                   |
|     |              | 2,810,613        | G         | A      |                     |                                                   |
|     |              | 2,810,859        | C         | T      |                     |                                                   |
|     |              | 2,811,267        | C         | T      |                     |                                                   |
|     |              | 2,811,434        | A         | G      |                     |                                                   |
|     |              | 2,811,593        | A         | T      |                     |                                                   |
|     |              | 2,811,663        | T         | G      |                     |                                                   |
|     |              | 2,811,874        | A         | T      |                     |                                                   |
|     |              | 2,811,938        | T         | G      |                     |                                                   |
| 4   | Os08g0149100 | 2,817,794        | C         | A      | P(C,A)              | Conserved hypothetical protein                    |
| 5   | Os08g0151300 | 2,948,776        | C         | T      | P(C) / L(T)         | R2R3-MYB transcription factor                     |
|     |              | 2,949,645        | G         | A      |                     |                                                   |
| 6   | Os08g0152333 | 3,000,973        | T         | C      |                     | Hypothetical protein                              |
|     |              | 3,001,197        | T         | C      | R(T,C)              |                                                   |
|     |              | 3,001,357        | A         | T      | I(A,T)              |                                                   |
| 7   | Os08g0190500 | 5,315,164        | C         | A      | L(C) / I(A)         | Conserved hypothetical protein                    |
| 8   | Os08g0191433 | 5,354,128        | G         | A      | A(G) / T(A)         | Starch synthase                                   |
|     |              | 5,354,184        | C         | T      | I(C,T)              |                                                   |
|     |              | 5,354,380        | T         | C      | I(T) / T(C)         |                                                   |
|     |              | 5,354,592        | C         | T      | I(C,T)              |                                                   |
|     |              | 5,354,722        | C         | T      | I(C,T)              |                                                   |
|     |              | 5,354,862        | G         | A      | Q(G,A)              |                                                   |
|     |              | 5,355,177        | G         | A      | A(G) / T(A)         |                                                   |
|     |              | 5,355,240        | G         | A      | Q(G,A)              |                                                   |
|     |              | 5,355,283        | C         | T      | P(C) / S(T)         |                                                   |
|     |              | 5,355,378        | G         | A      | Q(G,A)              |                                                   |
|     |              | 5,355,495        | T         | A      | I(T) / N(A)         |                                                   |
|     |              | 5,355,883        | A         | T      | L(A,T)              |                                                   |
|     |              | 5,356,488        | G         | A      | L(G,A)              |                                                   |
|     |              | 5,356,597        | A         | T      |                     |                                                   |
|     |              | 5,356,600        | A         | G      |                     |                                                   |
|     |              | 5,356,846        | C         | T      | R(C) / W(T)         |                                                   |
|     |              | 5,356,961        | G         | A      | E(G,A)              |                                                   |

|    |              |           |   |   |                    |                                                           |
|----|--------------|-----------|---|---|--------------------|-----------------------------------------------------------|
|    |              | 5,357,030 | T | A |                    |                                                           |
|    |              | 5,357,125 | T | C |                    |                                                           |
|    |              | 5,357,151 | A | G |                    |                                                           |
|    |              | 5,357,214 | A | C |                    |                                                           |
|    |              | 5,357,619 | G | A | A(G) / T(A)        |                                                           |
|    |              | 5,358,029 | A | G |                    |                                                           |
|    |              | 5,358,190 | A | G |                    |                                                           |
|    |              | 5,358,308 | C | T |                    |                                                           |
|    |              | 5,358,346 | T | C | I(T,C)             |                                                           |
|    |              | 5,358,518 | A | T |                    |                                                           |
|    |              | 5,358,803 | C | T |                    |                                                           |
| 8  | Os08g0191433 | 5,358,899 | G | A | I(T,C)             | Starch synthase                                           |
|    |              | 5,358,962 | C | T |                    |                                                           |
|    |              | 5,358,990 | A | G |                    |                                                           |
|    |              | 5,358,999 | C | T |                    |                                                           |
|    |              | 5,359,102 | C | T |                    |                                                           |
|    |              | 5,359,108 | T | C |                    |                                                           |
|    |              | 5,359,983 | A | G |                    |                                                           |
|    |              | 5,360,061 | C | A |                    |                                                           |
|    |              | 5,360,200 | T | G |                    |                                                           |
|    |              | 5,360,263 | T | G |                    |                                                           |
|    |              | 5,360,399 | A | C |                    |                                                           |
|    |              | 5,360,595 | T | A |                    |                                                           |
|    |              | 5,360,623 | G | A |                    |                                                           |
|    |              | 5,360,992 | G | A |                    |                                                           |
| 9  | Os08g0191466 | 5,361,571 | T | C |                    | Hypothetical gene                                         |
|    |              | 5,361,621 | T | C |                    |                                                           |
| 10 | Os08g0191700 | 5,374,282 | C | T |                    | Glyoxalase I                                              |
|    |              | 5,374,524 | C | T |                    |                                                           |
|    |              | 5,375,967 | T | C |                    |                                                           |
|    |              | 5,376,876 | G | C |                    |                                                           |
|    |              | 5,376,958 | C | G | A(C) / G(G)        |                                                           |
| 19 | Os09g0270700 | 5,278,515 | T | C | T(T,C)             | Disease resistance protein domain containing protein      |
| 20 | Os09g0271000 | 5,322,883 | T | A | M(T) / K(A)        | Hypothetical protein                                      |
| 21 | Os09g0272900 | 5,473,217 | A | G | -                  | Disease resistance protein domain containing protein      |
|    |              | 5,479,708 | G | C | K(G) / N(C)        |                                                           |
|    |              | 5,480,407 | A | G | N(A) / S(G)        |                                                           |
| 22 | Os09g0273600 | 5,538,837 | T | C | A(G) / P(C) / S(T) | Hypothetical gene                                         |
| 23 | Os09g0277100 | 5,758,819 | G | A | P(C) / T(A) / A(G) | Hypothetical protein                                      |
| 24 | Os09g0278300 | 5,799,059 | T | C | A(C) / V(T)        | Serine hydroxymethyltransferase domain containing protein |
|    |              | 5,805,200 | G | A | -                  |                                                           |
| 25 | Os09g0279300 | 5,865,094 | C | T | I(C,T)             | Mitochondrial inner membrane translocase                  |
| 26 | Os09g0279400 | 5,866,891 | A | G | R(A) / G(G)        | Rhodanese-like domain containing protein                  |
|    |              | 5,868,122 | C | T | -                  |                                                           |
|    |              | 5,868,279 | G | A | S(G) / N(A)        |                                                           |
|    |              | 5,868,331 | G | A | E(G,A)             |                                                           |
| 27 | Os09g0292300 | 6,803,268 | T | A | L(T) / H(A)        | Myb/SANT-like domain domain containing protein            |
|    |              | 6,805,086 | C | T | C(C,T)             |                                                           |

|    |              |           |   |   |                    |                                                                  |
|----|--------------|-----------|---|---|--------------------|------------------------------------------------------------------|
| 28 | Os09g0292900 | 6,873,519 | G | T | A(G,T)             | Galactose oxidase                                                |
|    |              | 6,873,637 | C | A | L(C) / I(A)        |                                                                  |
|    |              | 6,873,835 | A | G | T(A) / A(G)        |                                                                  |
| 29 | Os09g0295850 | 7,162,946 | A | G | I(A) / V(G)        | Conserved hypothetical protein                                   |
|    |              | 7,162,960 | C | T | C(C,T)             |                                                                  |
|    |              | 7,163,042 | T | C | V(T) / H(C)        |                                                                  |
| 30 | Os09g0296450 | 7,167,405 | G | T | -                  | Hypothetical protein                                             |
|    |              | 7,167,618 | G | A | -                  |                                                                  |
|    |              | 7,168,380 | A | C | -                  |                                                                  |
|    |              | 7,169,920 | C | T | E(A) / D(T,C)      |                                                                  |
| 31 | Os09g0296700 | 7,180,181 | G | T | R(G) / L(T)        | Glycosyl transferase                                             |
|    |              | 7,181,431 | C | T | R(C) / W(T)        |                                                                  |
| 32 | Os09g0296900 | 7,191,217 | A | G | T(A) / A(G)        | WD40 repeat-like domain containing protein                       |
|    |              | 7,191,938 | T | C | W(T) / R(C)        |                                                                  |
|    |              | 7,192,549 | A | T | -                  |                                                                  |
|    |              | 7,193,810 | A | G | T(A) / A(G)        |                                                                  |
|    |              | 7,194,521 | T | A | -                  |                                                                  |
|    |              | 7,194,743 | C | A | -                  |                                                                  |
| 33 | Os09g0297000 | 7,199,809 | G | T | -                  | Similar to Ferrochelatase                                        |
| 33 | Os09g0297000 | 7,202,574 | A | G | -                  | Similar to Ferrochelatase                                        |
|    |              | 7,204,241 | A | C | A(A,C)             |                                                                  |
| 34 | Os09g0297100 | 7,206,737 | G | A | -                  | Similar to CROC-1-like protein                                   |
|    |              | 7,206,823 | T | G | -                  |                                                                  |
|    |              | 7,206,941 | C | T | R(C) / C(T)        |                                                                  |
|    |              | 7,206,956 | G | A | I(A) / V(G)        |                                                                  |
|    |              | 7,207,398 | C | A | -                  |                                                                  |
|    |              | 7,207,651 | A | C | -                  |                                                                  |
|    |              | 7,207,745 | C | G | Q(C) / E(G)        |                                                                  |
| 35 | Os09g0297300 | 7,219,285 | T | G | G(T,G)             | Similar to sugar carrier protein C                               |
|    |              | 7,219,715 | A | G | M(A) / V(G)        |                                                                  |
| 36 | Os09g0297400 | 7,222,278 | C | T | -                  | Similar to Phosphate/phosphoenolpyruvate translocator            |
|    |              | 7,222,500 | C | G | A(C,G)             |                                                                  |
|    |              | 7,224,772 | C | T | -                  |                                                                  |
|    |              | 7,225,524 | C | T | -                  |                                                                  |
| 37 | Os09g0297800 | 7,232,112 | G | A | A(C) / D(A) / G(G) | Similar to GPI-anchored protein.                                 |
|    |              | 7,232,427 | A | T | -                  |                                                                  |
| 38 | Os09g0297900 | 7,233,528 | C | T | P(C) / L(T)        | Conserved hypothetical protein                                   |
| 39 | Os09g0298100 | 7,240,638 | C | T | I(C,T)             | Similar to predicted protein                                     |
| 40 | Os09g0298266 | 7,246,438 | A | T | -                  | Hypothetical gene                                                |
| 41 | Os09g0298332 | 7,262,928 | A | G | -                  | Conserved hypothetical protein                                   |
|    |              | 7,263,028 | C | A | P(C) / T(A)        |                                                                  |
|    |              | 7,263,030 | G | A | P(G,A)             |                                                                  |
|    |              | 7,263,083 | G | A | R(G) / H(A)        |                                                                  |
| 42 | Os09g0298400 | 7,271,375 | G | A | -                  | WD40/YVTN repeat-like domain containing protein                  |
|    |              | 7,271,467 | C | G | D(C) / E(G)        |                                                                  |
|    |              | 7,271,882 | A | G | -                  |                                                                  |
| 42 | Os09g0298400 | 7,271,978 | C | A | -                  | WD40/YVTN repeat-like domain containing protein                  |
|    |              | 7,272,245 | T | C | M(T) / T(C)        |                                                                  |
| 43 | Os09g0298700 | 7,293,500 | T | C | R(G) / P(C) / L(T) | Nucleotide-binding 2C alpha-beta plait domain containing protein |
|    |              | 7,296,497 | T | A | E(A) / D(T)        |                                                                  |

|    |              |           |   |   |                    |                                     |
|----|--------------|-----------|---|---|--------------------|-------------------------------------|
|    |              | 7,296,539 | G | A | L(A,G)             |                                     |
|    |              | 7,296,619 | A | G | R(G) / K(A)        |                                     |
|    |              | 7,296,674 | T | C | H(T,C)             |                                     |
|    |              | 7,296,789 | T | C | G(A,C,T)           |                                     |
|    |              | 7,297,117 | T | G | R(G) / M(T)        |                                     |
|    |              | 7,297,151 | C | T | P(A,T,C)           |                                     |
|    |              | 7,297,667 | C | T | -                  |                                     |
|    |              | 7,298,025 | A | G | Q(C,G) / K(A)      |                                     |
|    |              | 7,298,385 | T | C | Q(C) / -(T)        |                                     |
|    |              | 7,298,620 | C | T | Q(A) / L(T) / P(C) |                                     |
|    |              | 7,299,100 | G | A | S(C) / V(A) / C(G) |                                     |
| 44 | Os09g0299200 | 7,329,697 | A | C | -                  | MYB-type transcription factor       |
|    |              | 7,331,515 | G | A | G(G) / E(A)        |                                     |
| 45 | Os09g0299400 | 7,336,763 | T | C | V(C,T)             | Similar to TPK1                     |
|    |              | 7,336,832 | G | A | A(G,A)             |                                     |
|    |              | 7,337,153 | C | T | L(C,T)             |                                     |
|    |              | 7,337,226 | C | G | G(G) / R(C)        |                                     |
|    |              | 7,337,258 | T | G | R(G,T)             |                                     |
|    |              | 7,337,382 | C | A | M(A) / L(C)        |                                     |
|    |              | 7,338,873 | G | A | -                  |                                     |
|    |              | 7,339,466 | T | C | -                  |                                     |
|    |              | 7,339,580 | A | G | -                  |                                     |
|    |              | 7,339,897 | C | G | -                  |                                     |
|    |              | 7,340,117 | C | A | I(A) / L(C)        |                                     |
| 45 | Os09g0299400 | 7,340,198 | C | T | -                  | Similar to TPK1                     |
| 46 | Os09g0299500 | 7,347,460 | A | G | -                  | Similar to predicted protein        |
|    |              | 7,347,709 | C | T | -                  |                                     |
|    |              | 7,347,940 | T | C | -                  |                                     |
|    |              | 7,348,135 | C | A | G(G) / S(A) / R(C) |                                     |
| 47 | Os09g0301800 | 7,519,094 | G | A | -                  | Hypothetical conserved gene         |
|    |              | 7,520,853 | A | G | N(A) / S(G)        |                                     |
|    |              | 7,521,294 | C | T | T(C,T)             |                                     |
|    |              | 7,521,988 | A | T | L(A,T)             |                                     |
|    |              | 7,522,797 | A | G | -                  |                                     |
| 48 | Os09g0302233 | 7,537,286 | G | T | -                  | Similar to Zinc knuckle domain-like |
| 49 | Os09g0304400 | 7,741,337 | T | C | M(G) / I(C,T)      | Conserved hypothetical protein      |
|    |              | 7,742,719 | A | G | E(A,G)             |                                     |

Table S3. Genotype information of 96 KASP markers for background selection.

| Name     | Chromosome | Position(bp) | Samgwang | Milkyqueen | Name     | Chromosome | Position(bp) | Samgwang | Milkyqueen |
|----------|------------|--------------|----------|------------|----------|------------|--------------|----------|------------|
| KJ01_001 | 1          | 728,809      | B        | A          | KJ04_095 | 4          | 35,078,228   | B        | A          |
| KJ01_015 | 1          | 4,209,102    | A        | B          | KJ05_005 | 5          | 1,243,736    | B        | A          |
| KJ01_031 | 1          | 9,880,602    | B        | A          | KJ05_015 | 5          | 5,360,210    | B        | A          |
| KJ01_045 | 1          | 13,519,853   | B        | A          | KJ05_022 | 5          | 7,194,845    | A        | B          |
| KJ01_063 | 1          | 19,095,472   | A        | B          | KJ05_028 | 5          | 11,098,186   | A        | B          |
| KJ01_069 | 1          | 21,109,231   | B        | A          | KJ05_030 | 5          | 15,317,821   | B        | A          |
| KJ01_082 | 1          | 27,055,210   | B        | A          | KJ05_039 | 5          | 18,623,022   | A        | B          |
| KJ01_088 | 1          | 30,307,657   | A        | B          | KJ05_051 | 5          | 22,081,477   | A        | B          |
| KJ01_100 | 1          | 34,102,017   | A        | B          | KJ05_060 | 5          | 24,999,987   | B        | A          |
| KJ01_113 | 1          | 38,104,765   | B        | A          | KJ05_076 | 5          | 28,718,002   | A        | B          |
| KJ01_130 | 1          | 43,140,530   | B        | A          | KJ06_004 | 6          | 637,769      | A        | B          |
| KJ02_001 | 2          | 3,548,115    | A        | B          | KJ06_014 | 6          | 3,977,139    | A        | B          |
| KJ02_005 | 2          | 4,656,692    | A        | B          | KJ06_027 | 6          | 7,708,089    | B        | A          |
| KJ02_011 | 2          | 5,819,810    | A        | B          | KJ06_040 | 6          | 10,780,360   | A        | B          |
| KJ02_020 | 2          | 9,978,736    | B        | A          | KJ06_047 | 6          | 13,351,589   | A        | B          |

|          |    |            |   |   |          |    |            |   |   |
|----------|----|------------|---|---|----------|----|------------|---|---|
| KJ02_030 | 2  | 20,079,102 | B | A | KJ06_064 | 6  | 17,875,066 | A | B |
| KJ02_065 | 2  | 29,958,026 | B | A | KJ06_071 | 6  | 21,799,623 | B | A |
| KJ02_071 | 2  | 32,118,114 | B | A | KJ06_079 | 6  | 24,997,051 | A | B |
| KJ02_073 | 2  | 33,142,844 | A | B | KJ06_082 | 6  | 29,179,807 | A | B |
| KJ02_081 | 2  | 35,187,201 | A | B | KJ07_017 | 7  | 3,705,757  | B | A |
| KJ03_004 | 3  | 962,390    | B | A | KJ07_026 | 7  | 7,431,843  | B | A |
| KJ03_010 | 3  | 2,745,334  | A | B | KJ07_033 | 7  | 11,030,430 | A | B |
| KJ03_016 | 3  | 4,788,297  | B | A | KJ07_039 | 7  | 15,311,521 | A | B |
| KJ03_022 | 3  | 6,830,072  | B | A | KJ07_061 | 7  | 20,728,990 | B | A |
| KJ03_036 | 3  | 17,273,847 | A | B | KJ07_075 | 7  | 24,968,707 | B | A |
| KJ03_050 | 3  | 20,832,905 | A | B | KJ07_082 | 7  | 28,377,055 | B | A |
| KJ03_060 | 3  | 24,294,753 | B | A | KJ08_011 | 8  | 2,940,939  | A | A |
| KJ03_067 | 3  | 28,167,520 | A | B | KJ08_026 | 8  | 6,404,031  | A | B |
| KJ04_004 | 4  | 864,053    | B | A | KJ08_038 | 8  | 9,004,923  | A | B |
| KJ04_027 | 4  | 5,789,508  | A | B | KJ08_044 | 8  | 10,273,969 | B | A |
| KJ04_040 | 4  | 9,411,427  | A | B | KJ08_060 | 8  | 14,184,710 | A | B |
| KJ04_048 | 4  | 12,116,458 | B | A | KJ08_074 | 8  | 17,642,104 | B | A |
| KJ04_053 | 4  | 17,250,626 | B | A | KJ08_087 | 8  | 20,637,053 | A | B |
| KJ04_062 | 4  | 20,495,719 | A | B | KJ08_091 | 8  | 26,979,434 | A | B |
| KJ04_077 | 4  | 24,780,440 | A | B | KJ09_011 | 9  | 3,627,789  | B | A |
| KJ04_087 | 4  | 31,581,963 | B | A | KJ09_025 | 9  | 7,555,220  | A | B |
| KJ09_039 | 9  | 11,439,570 | B | A | KJ11_043 | 11 | 12,295,393 | A | B |
| KJ09_054 | 9  | 14,978,933 | B | A | KJ11_057 | 11 | 15,591,509 | A | B |
| KJ09_069 | 9  | 18,818,854 | A | B | KJ11_072 | 11 | 19,593,598 | B | A |
| KJ09_076 | 9  | 20,688,681 | B | A | KJ11_089 | 11 | 23,101,149 | A | B |
| KJ10_001 | 10 | 493,487    | A | B | KJ11_100 | 11 | 27,626,227 | B | A |
| KJ10_014 | 10 | 3,833,548  | A | B | KJ12_007 | 12 | 3,791,039  | B | A |
| KJ10_017 | 10 | 14,166,643 | B | A | KJ12_016 | 12 | 5,782,882  | A | B |
| KJ10_027 | 10 | 17,508,129 | A | B | KJ12_026 | 12 | 10,614,915 | B | A |
| KJ10_039 | 10 | 20,358,666 | A | B | KJ12_036 | 12 | 14,173,587 | A | B |
| KJ10_046 | 10 | 21,931,430 | B | A | KJ12_045 | 12 | 16,493,747 | B | A |
| KJ11_007 | 11 | 2,831,357  | A | B | KJ12_055 | 12 | 21,484,803 | A | B |
| KJ11_024 | 11 | 7,461,078  | A | B | KJ12_062 | 12 | 25,427,169 | B | A |

**Table S4.** Statistical analysis for the segregation ratio of the selected lines in BC<sub>2</sub>F<sub>1</sub> was detected as the segregation ratio of 1 : 2 : 1 by a  $\chi^2$ -test ( $P=0.05$ ) as expected in BC<sub>2</sub>F<sub>2</sub> between Samgwang and Milkyqueen.

| Population            | Generation                     | Number of plants |               |                 |               | $\chi^2$ value<br>(1:2:1) |
|-----------------------|--------------------------------|------------------|---------------|-----------------|---------------|---------------------------|
|                       |                                | Total            | Homo<br>(G/G) | Hetero<br>(G/A) | Homo<br>(A/A) |                           |
| Samgwang x Milkyqueen | BC <sub>2</sub> F <sub>2</sub> | 70               | 15            | 39              | 16            | 0.943 <sup>ns</sup>       |

$d.f = 2$ ;  $\chi^2 (0.05, 2) = 5.99$

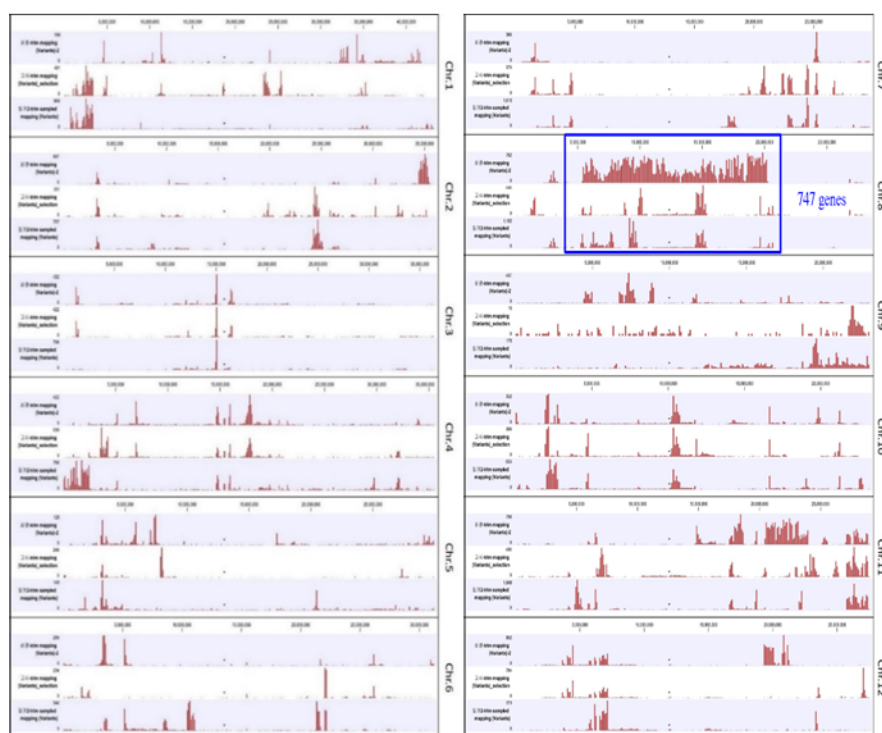

**Figure S1.** Distribution of SNPs between Samgwang and Milkyqueen, Kosihikari in the 12 rice chromosomes. The X-axis represents the physical distance along each chromosome in base-pair (bp) unit. The Y-axis indicates the common logarithm of the number of SNPs.

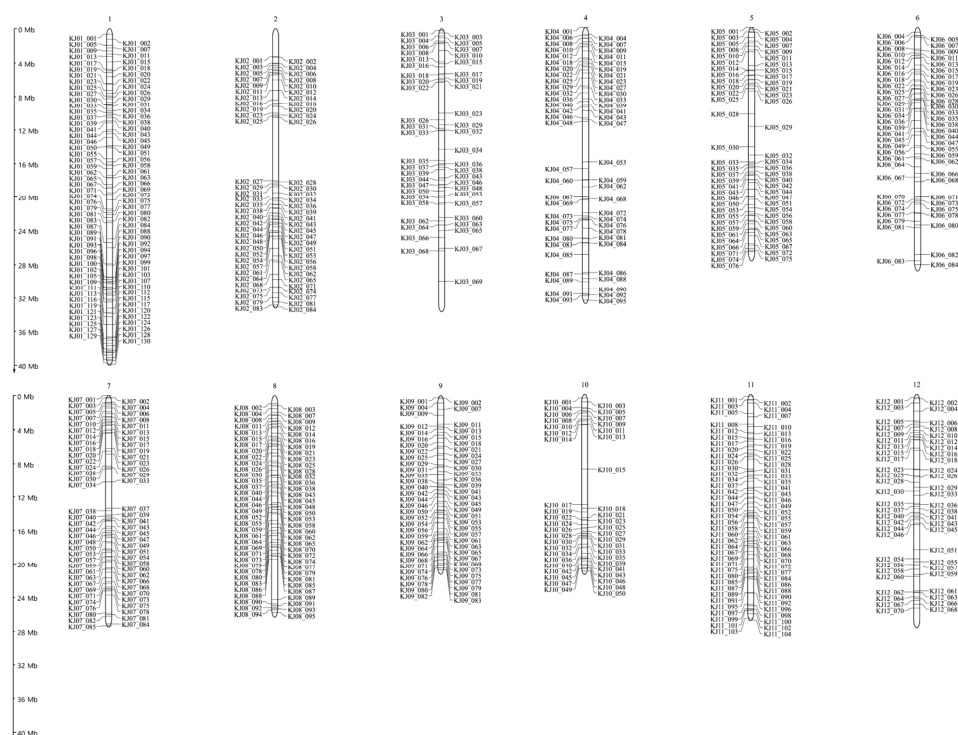

**Figure S2.** 773 KASP markers were used for analysis of marker effectiveness between parents, Samgwang and Milkyqueen.

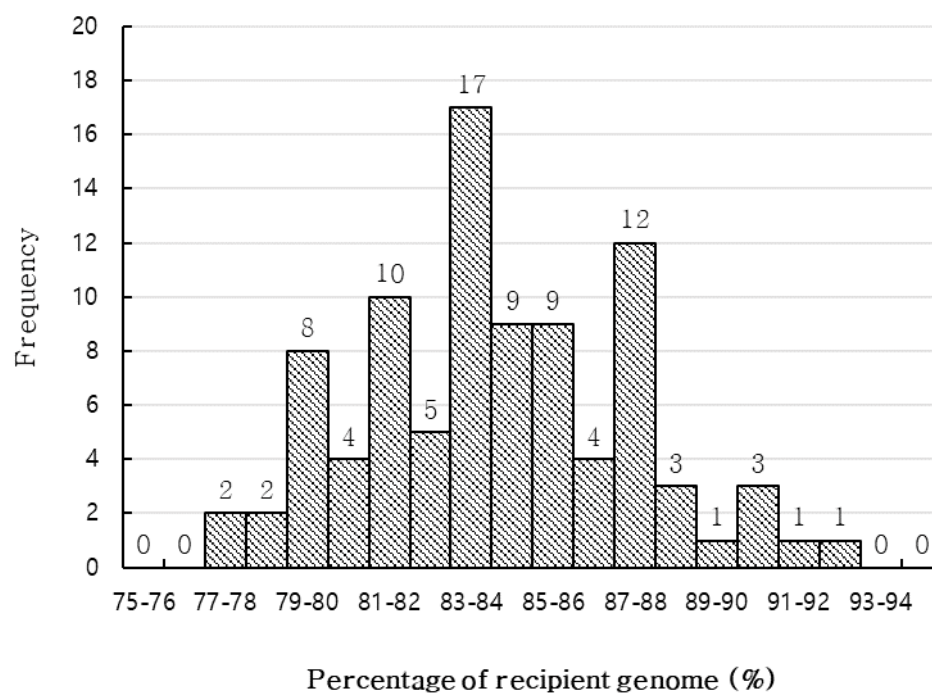

**Figure S3.** Frequency distribution of the genome recovery rate (%) of the recurrent parent in BC1F1 population.

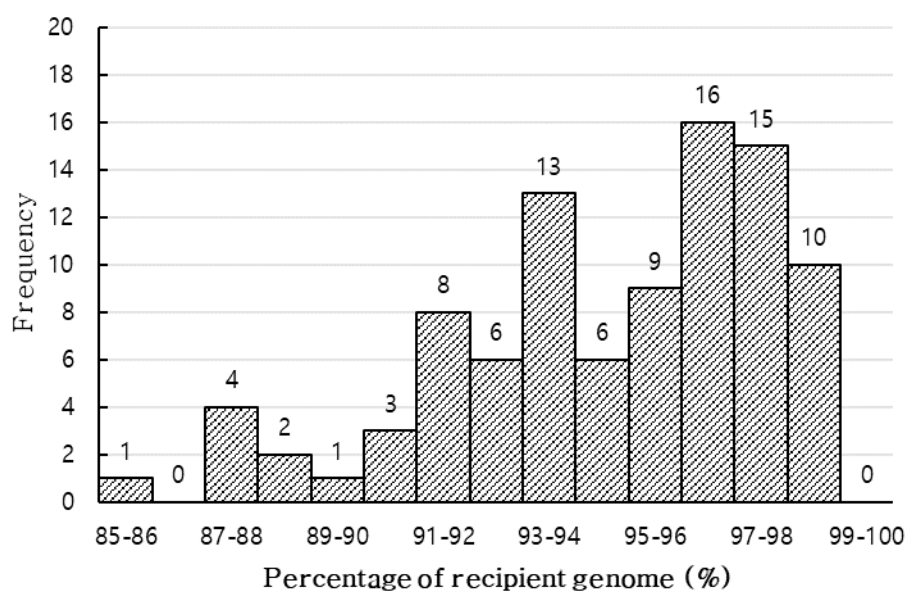

**Figure S4.** Frequency distribution of the genome recovery rate (%) of the recurrent parent in BC2F1 population.
